# Supplementary material
Source: Springer Nature journal article supplement (https://www.springermedizin.de/resource/supplementary/12883_2013_864_MOESM5_ESM.pdf/9456006)
Supplement: MOESM5 [file 9456006]

Records identified through  
EMBASE  
(n=3239)

Records identified through  
MEDLINE  
(n=686)

3925 citations

669 duplicates removed

3,256 unique citations evaluated for  
relevance

2781 citations not relevant  
citations by title or abstract  
review

475 review and original studies  
deemed potentially relevant

16 additional potentially  
relevant studies identified by  
hand searching references of  
relevant papers and reviews

491 review and original  
studies deemed relevant by  
title & abstract or needed  
full text to make  
determination

368 citations that did not  
meet eligibility criteria for the  
review as follows:

63 review articles

55 non-English or French (33  
from Europe)

53 abstract, letter or editorial

53 not prevalence or incidence  
study

23 not population-based

17 not original data

40 data collected prior to 1985

4 papers not available

57 from regions other than  
Europe

3 further duplicates removed

123 studies included in  
systematic review
